# Supplementary material for: Telehealth for patients with interstitial lung diseases (ILD): results of an international survey of clinicians
Source: PubMed Central journal article supplement — BMJ Open Respir Res. 2021 Dec 28;8(1):e001088. doi: 10.1136/bmjresp-2021-001088 (PMC8718433; doi:10.1136/bmjresp-2021-001088), 2021-12-28
Supplement: bmjresp-2021-001088supp001.pdf [file bmjresp-2021-001088supp001.pdf]

**Telehealth for patients with interstitial lung diseases (ILD): results of an international survey of clinicians**

**SUPPLEMENTARY APPENDIX**

*Malik A. Althobiani<sup>1</sup>, Jaber S. Alqahtani<sup>1</sup>, Anne-Marie Russell<sup>\*2</sup>, John R. Hurst<sup>\*1</sup>, Joanna C. Porter<sup>\*1</sup>*

Affiliation

1. UCL Respiratory, University College London
2. University of Exeter College of Medicine and Health.

\*Joint senior authors

## Appendix 1. Clinician questionnaire

### Tele-health for patients with interstitial lung diseases

Thank you for agreeing to take part in this survey

We really appreciate your time answering this anonymised service evaluation survey. Your responses will help us to better understand the value of tele-health in detecting deteriorations and/or progressions.

We define tele-health as home monitoring of symptoms and physiological parameters (e.g vital signs, spirometry) with regular automatic transmission of data from patient's home to the health-care provider.

The aim of this survey is to:

- Evaluate clinician services
- Gather clinical opinion
- Identify the methods and practices that are most effective to detect deteriorations and/ or exacerbations in patients with ILD in regard to the use of tele-health

This survey is brief and will take less than 5 minutes to complete.

This research study is being led by Professor Joanna Porter, and Professor John Hurst, Professors of Respiratory Medicine at University College London. This survey is being run in collaboration with Doctor Anne-Marie Russell, University of Exeter College of Medicine and Health.

Thank you for taking time to consider this survey. The study coordinator is Mr. Malik Althobiani. Please email: [malik.althobiani.20@ucl.ac.uk](mailto:malik.althobiani.20@ucl.ac.uk) if you would like more information about this survey.

---

\* 1. What is your age group?

- 18-24
- 25-34
- 35-44
- 45-54
- 55-64
- 65+
- Prefer not to say

**\* 2. What is your professional status?**

- Consultant physician
- Trainee physician
- Nurse
- Physician associate
- Speech and language therapist
- Occupational therapist
- Physiotherapist
- Healthcare assistant
- Primary care physician
- Dietician
- Clinical research
- Respiratory therapist
- Other (please specify)

**\* 3. In what country do you work?**

- England
- Scotland
- Wales
- Northern Ireland
- Rest of Europe
- North America
- South America
- Australasia
- Asia
- Africa
- Middle East
- Other (please specify)

\* 4. Is tele-health (As defined above) used by your place of work to remotely monitor ILD patients?

Yes

No

---



---

### Tele-health for patients with interstitial lung diseases

**\* 5. Tele-health (remote monitoring) is used by your place of work: (Please check all that apply)**

- To Provide early detection of exacerbation To
- identify disease progression
- To monitor quality of life
- To monitor use of medication including oxygen To
- help monitor recovery from exacerbations To
- avoid unnecessary in-person visit
- To provide psychological support
- Other (please specify)

**\* 6. In your experience how effective is tele-health compared to face-to-face monitoring?**

Neither effective nor

Not at all effective    Not particularly effective    ineffective    Quite effective    Very effective

**\* 7. What technologies do you use at your centre to remotely monitor patients with ILD? (Please check all that apply)**

- Smartphones/application monitoring (e.g. patientpower)
- Wearable devices monitoring
- Pulse oximeters with data transmission (either automated or manual)
- Spirometer with data transmission (either automated or manual) Other
- (please specify)

**\* 8. What variables do you use at your centre to remotely monitor patients with ILD? (Please check all that apply)**

- Symptoms Physical
- activity Oxygen use
- Oxygen saturation (SpO2)
- Spirometry
- Heart rate
- Respiratory rate
- The use of rescue medication
- Quality of life
- Cough (by audio detection)
- Other (please specify)

**\* 9. Please tell us how useful you think the following tele-health options might be in monitoring patients with ILD? (Please check all that apply)**

|                                                                                            | Not at all useful     | Slightly useful       | Moderately useful     | Very useful           | Extremely useful      |
|--------------------------------------------------------------------------------------------|-----------------------|-----------------------|-----------------------|-----------------------|-----------------------|
| Remote monitoring for symptoms using electronic questionnaires                             | <input type="radio"/> |
| Home based monitoring using smartphone /tablet app                                         | <input type="radio"/> |
| An online remote monitoring system using wearable sensor (e.g garmin, fitbit, apple watch) | <input type="radio"/> |

## \* 10. The main barriers to clinician participation in Tele-health are:

|                                   | Strongly disagree     | Disagree              | Neutral               | Agree                 | Strongly agree        |
|-----------------------------------|-----------------------|-----------------------|-----------------------|-----------------------|-----------------------|
| Lack of professional confidence   | <input type="radio"/> |
| Lack of training                  | <input type="radio"/> |
| Lack of evidence for efficacy     | <input type="radio"/> |
| Lack of time and/or work overload | <input type="radio"/> |
| Lack of organizational structure  | <input type="radio"/> |
| Cost                              | <input type="radio"/> |
| Clinical governance issues        | <input type="radio"/> |
| Technical issues                  | <input type="radio"/> |

## \* 11. The main barriers to patient participation in Tele-health are:

|                                                | Strongly disagree     | Disagree              | Neutral               | Agree                 | Strongly agree        |
|------------------------------------------------|-----------------------|-----------------------|-----------------------|-----------------------|-----------------------|
| Lack of confidence in tele-health              | <input type="radio"/> |
| lack of knowledge of using smartphones         | <input type="radio"/> |
| Lack of awareness                              | <input type="radio"/> |
| Lack of manual dexterity                       | <input type="radio"/> |
| Limited access to smartphones                  | <input type="radio"/> |
| Limited access to internet                     | <input type="radio"/> |
| Visual impairment (can not read LCD screens)   | <input type="radio"/> |
| Mistrust of technology                         | <input type="radio"/> |
| Privacy and confidentiality concerns or issues | <input type="radio"/> |
| Language barriers                              | <input type="radio"/> |

## \* 12. What would be the biggest help to you to set up tele-health in your institution?

**13. Do you have any further comments or suggestions regarding using tele-health programs?****14. Please enter your name and email, if you wish to see the survey results!(Optional)**

Name

Email Address
